# Supplementary material for: Arbuscular mycorrhizal inoculation increases molybdenum accumulation but decreases molybdenum toxicity in maize plants grown in polluted soil
Source: PubMed Central journal article supplement — RSC Adv. 2018 Nov 5;8(65):37069–76. doi: 10.1039/c8ra07725h (PMC9089312; doi:10.1039/c8ra07725h), 2018-11-05
Supplement: RA-008-C8RA07725H-s001.pdf [file RA-008-C8RA07725H-s001.pdf]

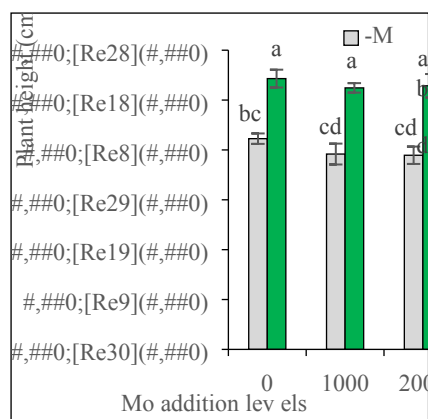

Fig. S1 Plant height (means  $\pm$  SE,  $n=4$ ) of maize plants. - M and + M represent non AM-inoculation and inoculation with *Claroideoglonus etunicatum* BEG 168, respectively. Different letters on the bars indicate significant differences among all means in different treatments using a one-way ANOVA followed by the Duncan's multiple range test ( $P < 0.05$ ). Two-way ANOVA results: AM:  $F=112.90^{**}$ , Mo:  $F=6.52^{**}$ , AM  $\times$  Mo:  $F=0.23^{ns}$

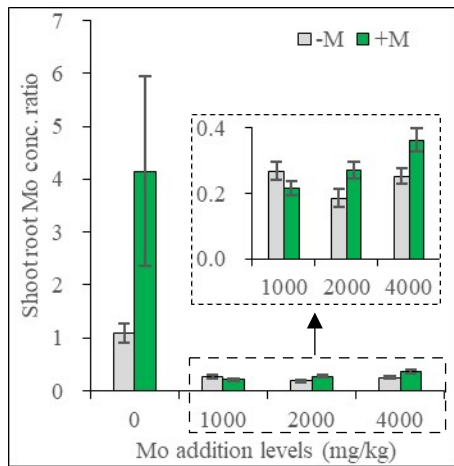

Fig. S2 Shoot/root Mo ratio (means  $\pm$  SE,  $n=4$ ) of maize plants. - M and + M represent non AM-inoculation and inoculation with *Claroideoglomus etunicatum* BEG 168, respectively. Different letters on the bars indicate significant differences among all means in different treatments using a one-way ANOVA followed by the Duncan's multiple range test ( $P < 0.05$ ). Two-way ANOVA results: AM:  $F=10.97^{**}$ , Mo:  $F=21.63^{**}$ , AM  $\times$  Mo:  $F=8.85^{**}$
